# Supplementary material for: Global Fractional Flow Reserve Value Predicts 5‐Year Outcomes in Patients With Coronary Atherosclerosis But Without Ischemia
Source: PubMed Central journal article supplement — J Am Heart Assoc. 2020 Dec 7;9(24):e017729. doi: 10.1161/JAHA.120.017729 (PMC7955380; doi:10.1161/jaha.120.017729), 2020-12-07
Supplement: JAH3-9-e017729-s001.pdf [file JAH3-9-e017729-s001.pdf]

# **SUPPLEMENTAL MATERIAL**

**Figure S1. Kaplan-Meier graph reporting the cumulative incidence of MACE up to 5 years in the low global FFR group (red), mid global FFR group (orange) and in the high FFR group (green) for patients from the Registry Group of FAME 2.**

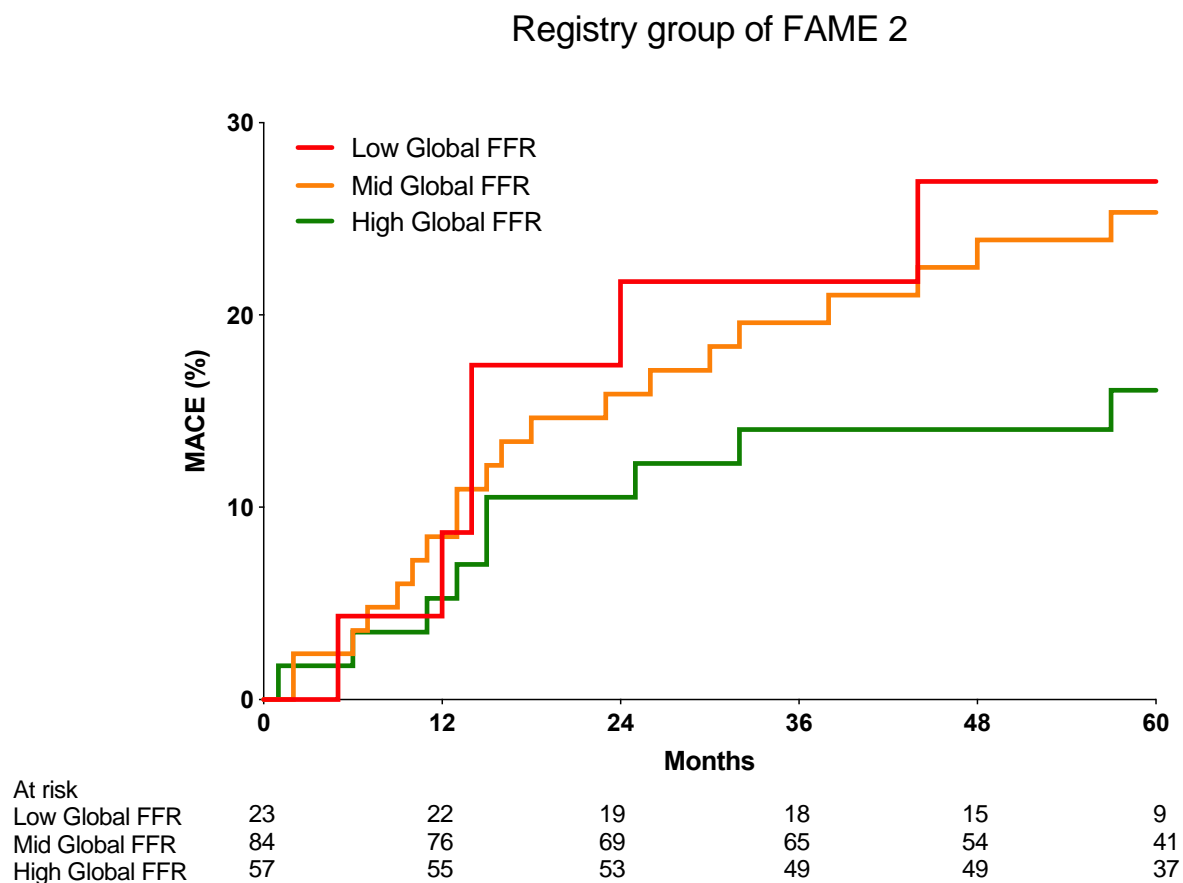

MACE: Major Adverse Cardiovascular Events; FFR: Fractional Flow Reserve.
